# Supplementary material for: Tetraspanin TM4SF5 mediates loss of contact inhibition through epithelial-mesenchymal transition in human hepatocarcinoma
Source: JCI journal article supplement (doi:10.1172/jci33768), 2008-03-18
Supplement: sd1 [file 1]

## Supplemental Information

### Tetraspanin TM4SF5 mediates epithelial-mesenchymal transition leading to loss of contact inhibition

Sin-Ae Lee<sup>1,2,\*</sup>, Sung-Yul Lee<sup>1,2,\*</sup>, Ik-Hyun Cho<sup>3</sup>, Min-A Oh<sup>1,4</sup>, Eun-Sil Kang<sup>1,2</sup>, Yong-Bae Kim<sup>1,4</sup>, Woo Duck Seo<sup>5</sup>, Su-Yong Choi<sup>1,4</sup>, Ju-Ock Nam<sup>6</sup>, Mimi Tamamori-Adachi<sup>7</sup>, Shigetaka Kitajima<sup>7</sup>, Sang-Kyu Ye<sup>8</sup>, Semi Kim<sup>9</sup>, Yoon-Jin Hwang<sup>10</sup>, In-San Kim<sup>6</sup>, Ki Hun Park<sup>5</sup>, and Jung Weon Lee<sup>1,2,4,11</sup>. \*Equally contributed.

### Supplemental Figures

**Figure S1. Differential actin organization in TM4SF5-null or -expressing cells.**

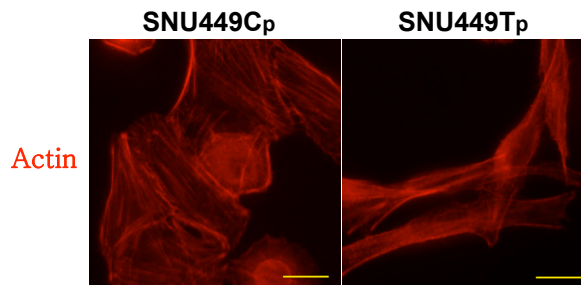

Control (SNU449Cp) or TM4SF5-expressing (SNU449Tp) cells on glass coverslips precoated with 10% FBS/RPMI-1640 were stained with phalloidin-conjugated with rhodamine. Scale bar for 20  $\mu$ m.

**Figure S2. Dominant p27<sup>Kip1</sup> level in cytosol.**

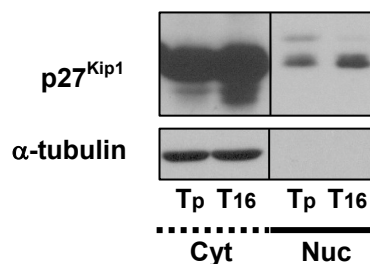

Nucleus and cytosol fractions were prepared from subconfluent SNU449Tp and SNU449T16 cells, as described in Supplemental Experimental Procedures, prior to immunoblots against anti-p27<sup>Kip1</sup> or  $\alpha$ -tubulin antibody.

**Figure S3. Y577F FAK mutation did not affect p27<sup>Kip1</sup> level and Ser10 phosphorylation in SNU449Tp cells.**

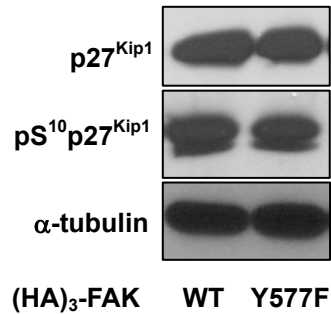

Whole cell lysates prepared from SNU449Tp cells transfected with (HA)<sub>3</sub>-tagged FAK WT or Y577F mutant, as in Figure 2H, were immunoblotted for indicated molecules.

**Figure S4. Reduction of cytosolic p27<sup>Kip1</sup> in SNU449Tp cells via lysophosphatidic acid (LPA) treatment.**

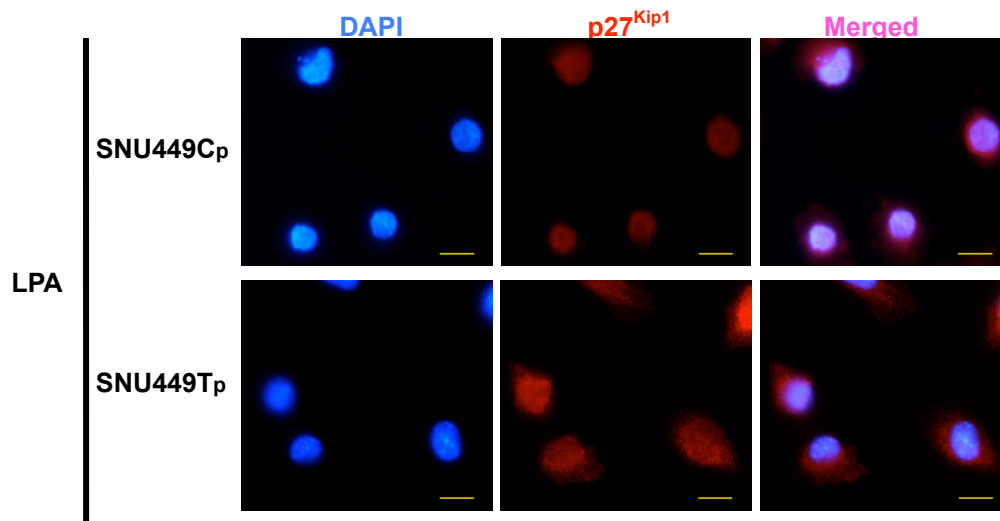

SNU449Cp and SNU449Tp cells on coverslips precoated with 10% FBS/RPMI-1640 were treated with 10 mM LPA for 1 h, before double-staining for DAPI and p27<sup>Kip1</sup>, as in Figure 3B. Note that LPA-treated SNU449Tp cells showed retracted morphology with less p27<sup>Kip1</sup> in cytoplasm, compared to untreated cells shown in Figure 3B (bottom). Scale bar for 20 μm.

**Figure S5. TM4SF5-enhanced S-phase progression is blocked by LPA treatment.**

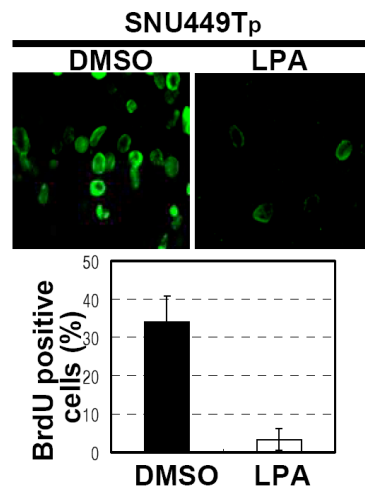

SNU449Tp cells treated with DMSO or LPA were analyzed for S-phase progression via BrdU incorporation assay, as described in Materials and Methods.

**Figure S6. Reconstitution of E-cadherin in TM4SF5-expressing cells.**

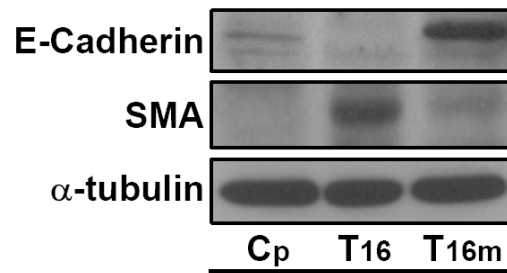

SNU449Cp (Cp), SNU449T16 (T16), and SNU449T16m (T16m) cells were harvested for whole cell lysates, prior to immunoblots for indicated molecules.
